# Supplementary material for: Mesoporous silica SBA-15 composite for the delivery of amoxicillin against S. aureus skin infection
Source: Royal Society of Chemistry journal article supplement (doi:10.1039/d3nj00109a), 2023-01-01
Supplement: d3nj00109a1.pdf [file d3nj00109a1.pdf]

## Supporting information

### Mesoporous silica SBA-15 composite for delivery of amoxicillin against *S. aureus* skin infection

Qingshuang Wang<sup>a</sup>, Yurui Cui<sup>a</sup>, Wei Ai<sup>a</sup>, Siqi Li<sup>a</sup>, Zhe Zhang<sup>b</sup>, Xiangru Feng<sup>\*a</sup>

#### Materials

Poly (ethylene glycol)-block-poly (propylene glycol)-block-poly (ethylene glycol) [Pluronic P123] was purchased from Aldrich. Tetraethyl orthosilicate (TEOS) and 3-(triethoxysilyl) propan-1-amine (APTES), toluene, hydrochloric acid and ethanol were purchased from Beijing Chemical Industry Department. Amoxicillin was purchased from Shanghai Macleans. Distilled water was used during the experiment.

#### Synthesis of SBA-15 and NH<sub>2</sub>-SBA-15

SBA-15 was synthesized according to the methods reported in Refs<sup>20,24</sup>. 2.0 g of pluronic 123 as a structure-directing agent was dissolved in a mixture of 15.0 mL distilled water and 60.0 mL 2M HCl and stirred at 40 °C for 4 h. Then 4.25 g TEOS was added into the solution and reacted overnight at 40 °C. The product was transferred into Teflon autoclave and crystallized in an oven at 100 °C for 2 days. The final solution was filtered, washed, and dried at room temperature. The organic surfactant was removed by calcination at 550 °C for 6 h.

The synthesized SBA-15 was then modified<sup>25</sup>. 1.0 g of calcined SBA-15 was dried at 100 °C for 3 h before being introduced into 40.0 mL dry toluene containing 10.0 mL (3-Aminopropyl) triethoxysilane (APTES). The mixture was heated to reflux under N<sub>2</sub> for 10 h. The product was washed with toluene followed by drying at 60 °C for 12 h. The final sample was collected and named as NH<sub>2</sub>-SBA-15.

#### Loading of amoxicillin

AM was loaded via post-impregnation. Specifically, 200.0 mg AM was fully dissolved in 200.0 mL distilled water. AM solution was further added with 200 mg SBA-15 or NH<sub>2</sub>-SBA-15 and stirred at 25°C for 24 h. Finally, the nanocomposite materials, *i.e.*, SBA-15@AM and NH<sub>2</sub>-SBA-15@AM were washed with distilled water, freeze-dried, and stored at 4 °C in the darkness. The AM content was detected at 272 nm by ultraviolet spectroscopy<sup>26</sup>. The drug loading contents (DLC) were then calculated by using the following equation.

$$\text{DLC} = \frac{\text{The weight of loaded drug}}{\text{The weight of nanocomposite material}} \times 100\%$$

Table S1 Structural parameters of samples

| sample                     | d100<br>(nm) | a0 <sup>a</sup><br>(nm) | BET surface area<br>(m <sup>2</sup> /g) | pore volume<br>(cm <sup>3</sup> /g) | pore diameter<br>(nm) | Zeta potential<br>(mV) |
|----------------------------|--------------|-------------------------|-----------------------------------------|-------------------------------------|-----------------------|------------------------|
| SBA-15                     | 106.86       | 123.39                  | 517.3611                                | 0.759016                            | 5.8684                | -28.2                  |
| SBA-15@AM                  | 110.06       | 127.08                  | 318.2137                                | 0.582798                            | 7.3259                | -31.3                  |
| NH <sub>2</sub> -SBA-15    | 110.61       | 127.72                  | 507.7084                                | 0.720520                            | 5.6766                | 25.4                   |
| NH <sub>2</sub> -SBA-15@AM | 108.04       | 124.75                  | 188.1651                                | 0.348844                            | 7.4157                | 23.2                   |

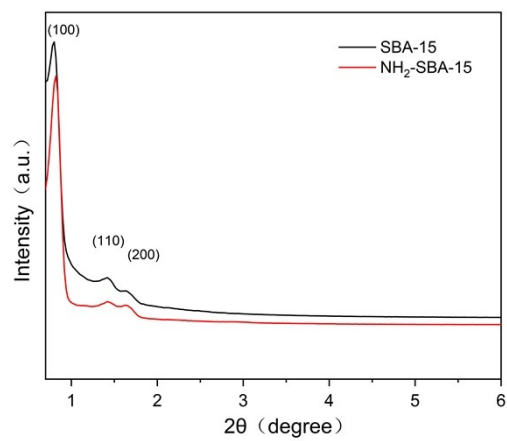

Figure S1. Small-angle XRD of SBA-15 and NH<sub>2</sub>-SBA-15.

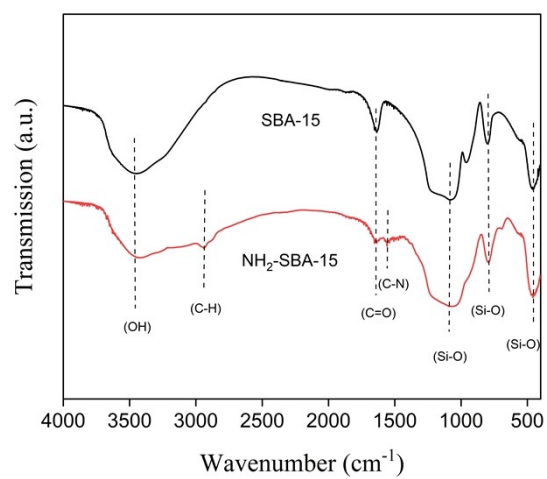

Figure S2. FT-IR spectra of SBA-15 and  $\text{NH}_2$ -SBA-15.

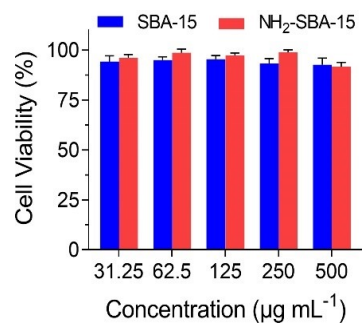

Figure S3. The cytotoxicity of SBA-15 and NH<sub>2</sub>-SBA-15 nanocomposites on L929 cells. Error bars represented standard deviations (n = 3).

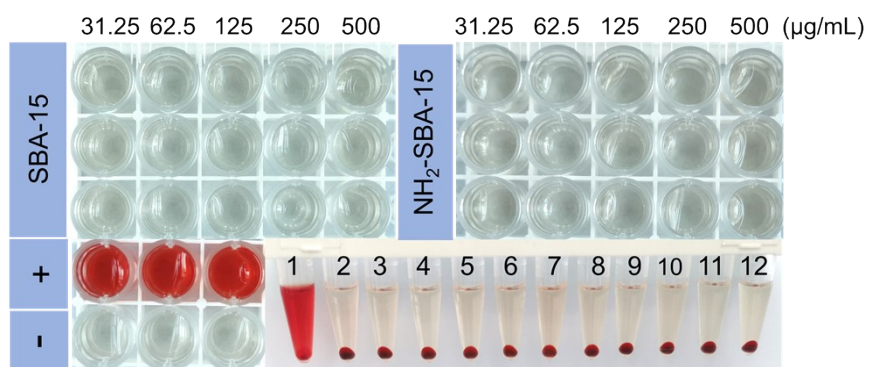

Figure S4. Hemolytic assays of SBA-15 and NH<sub>2</sub>-SBA-15 at different concentrations (31.25-500 µg/mL). 1 represents positive control (ddH<sub>2</sub>O), 2 represents negative control (PBS), 3-7 represent SBA-15 group in various concentrations (31.25-500 µg/mL), and 8-12 represent NH<sub>2</sub>-SBA-15 group in various concentrations (31.25-500 µg/mL).

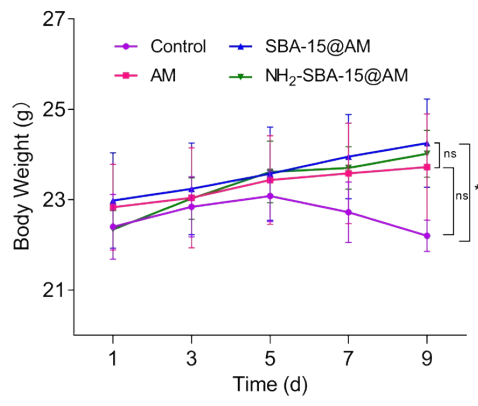

Figure S5. Body weight of mice during treatment.
