# Supplementary figures and images for: Mesoporous silica SBA-15 composite for the delivery of amoxicillin against S. aureus skin infection
Source: Royal Society of Chemistry journal article supplement (doi:10.1039/d3nj00109a), 2023-01-01

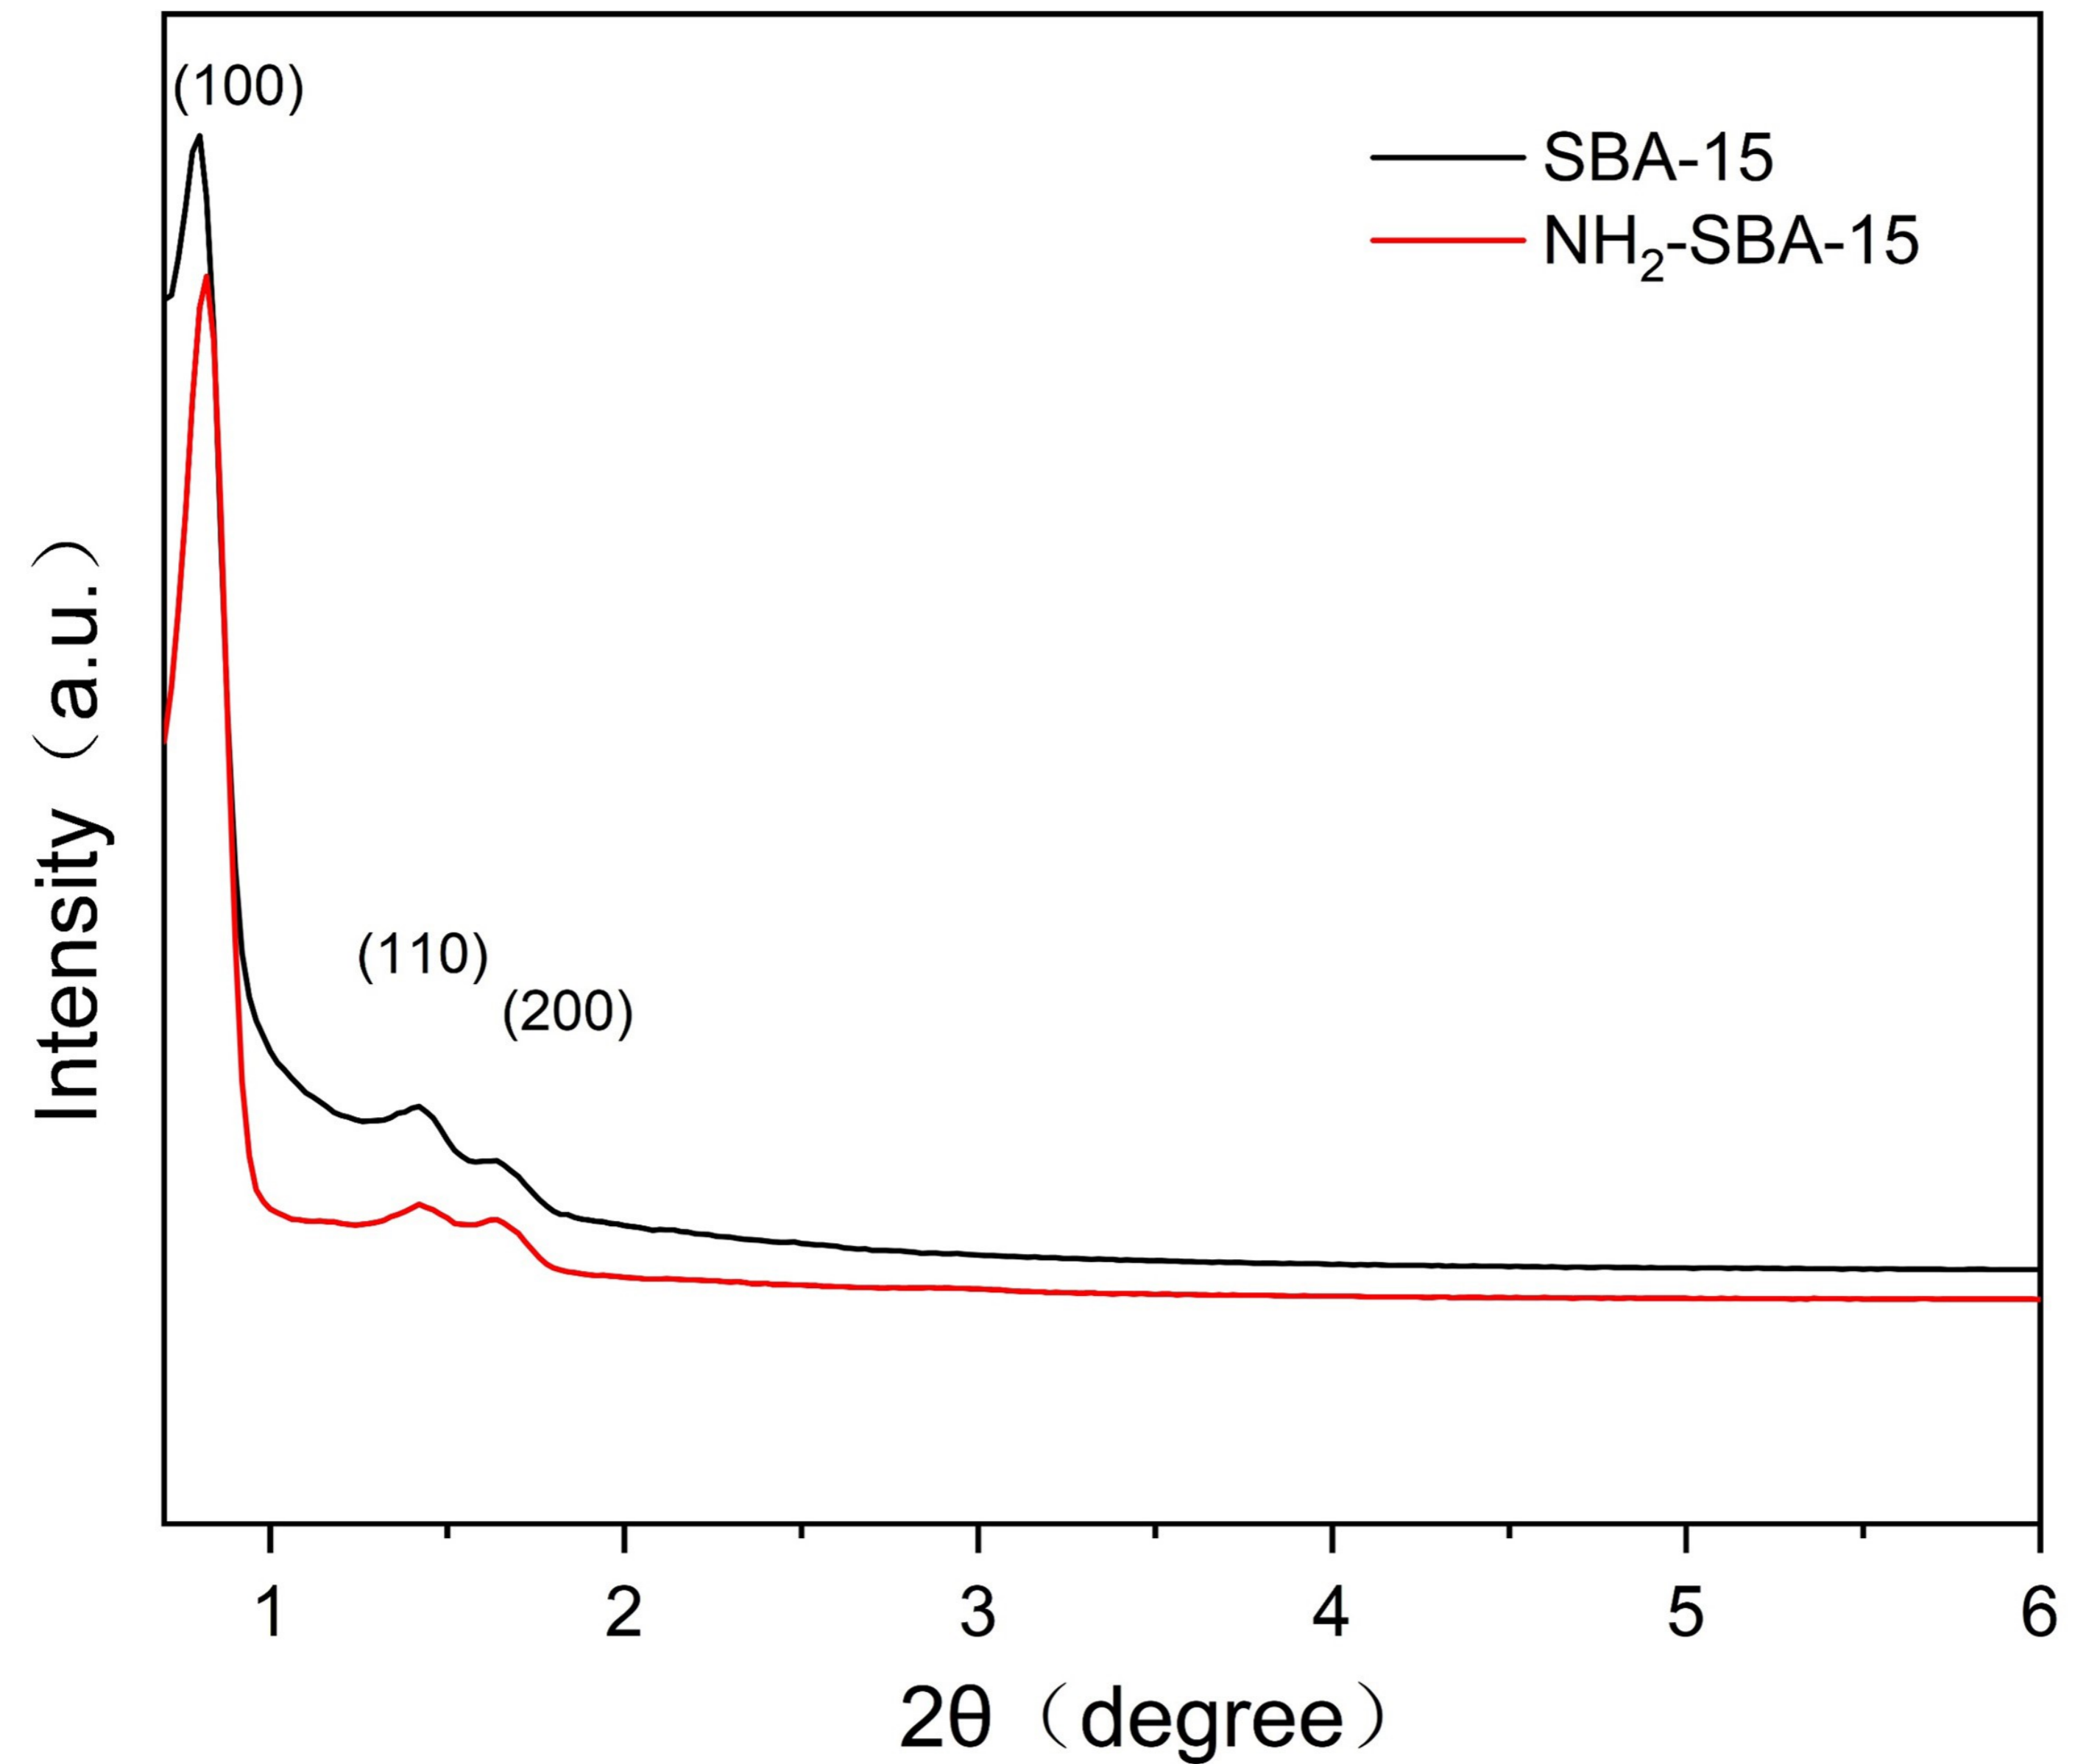

Supplement: d3nj00109a3.pdf [file d3nj00109a3.pdf]

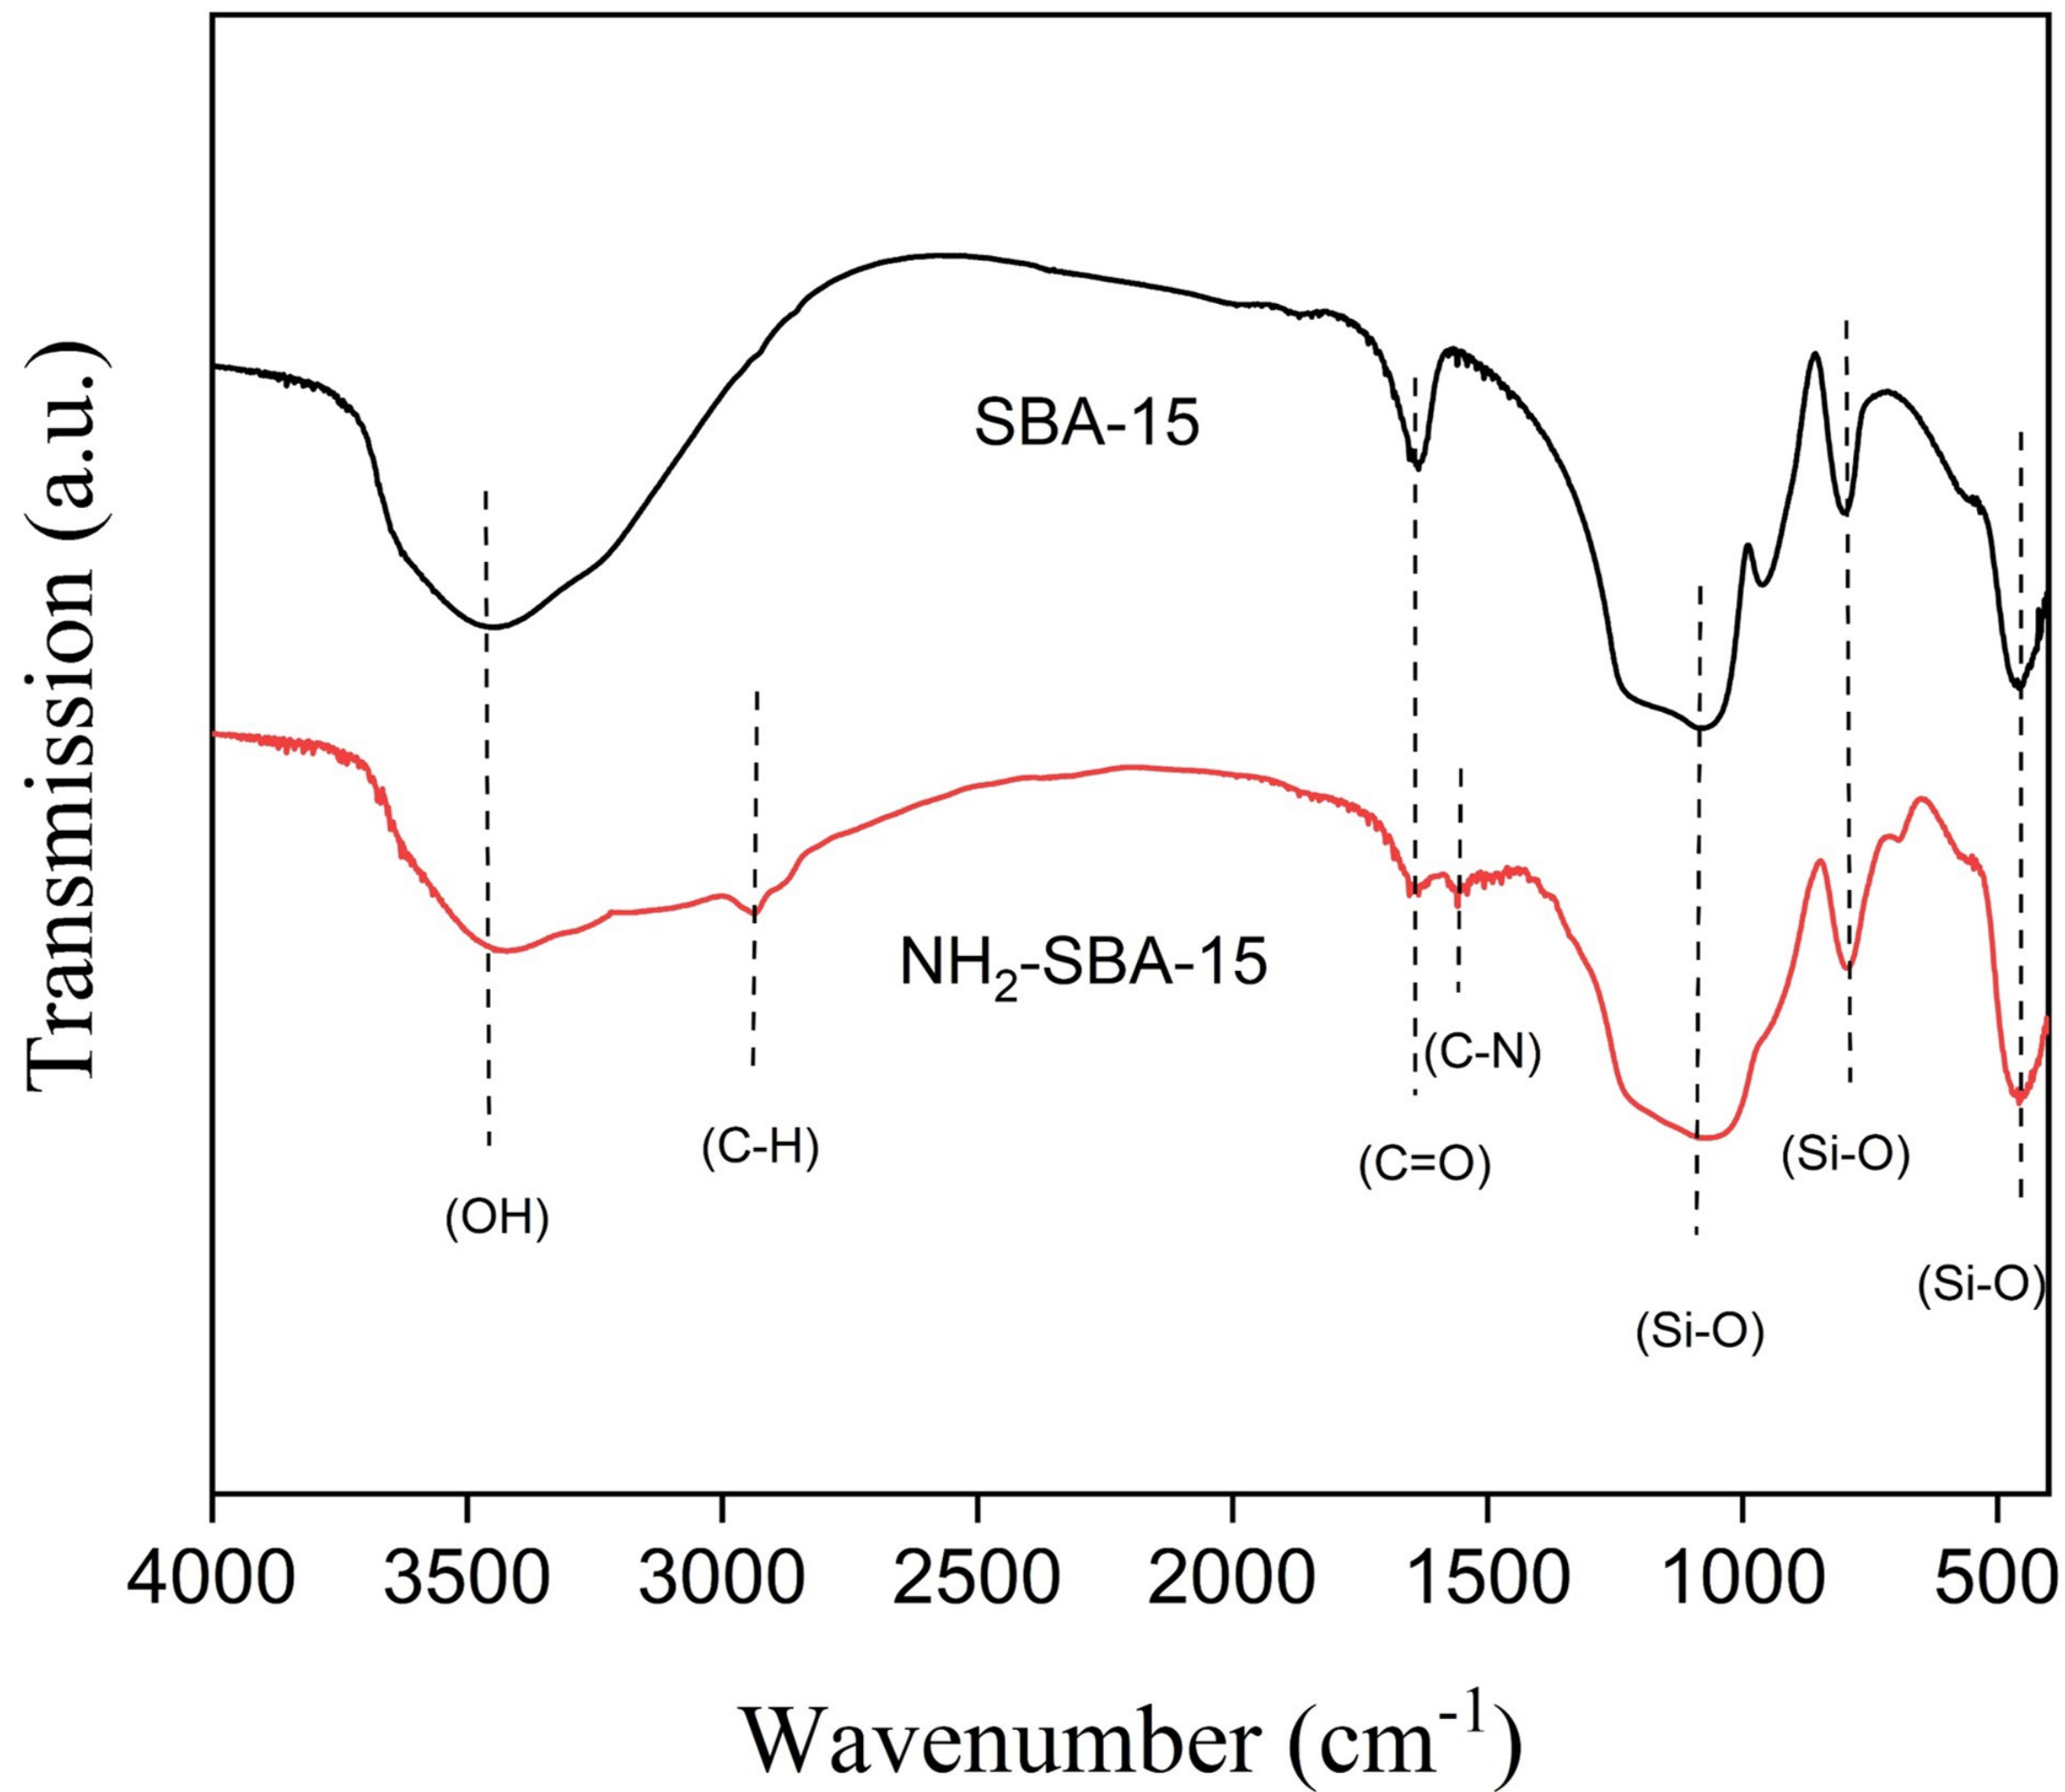

Supplement: d3nj00109a4.pdf [file d3nj00109a4.pdf]

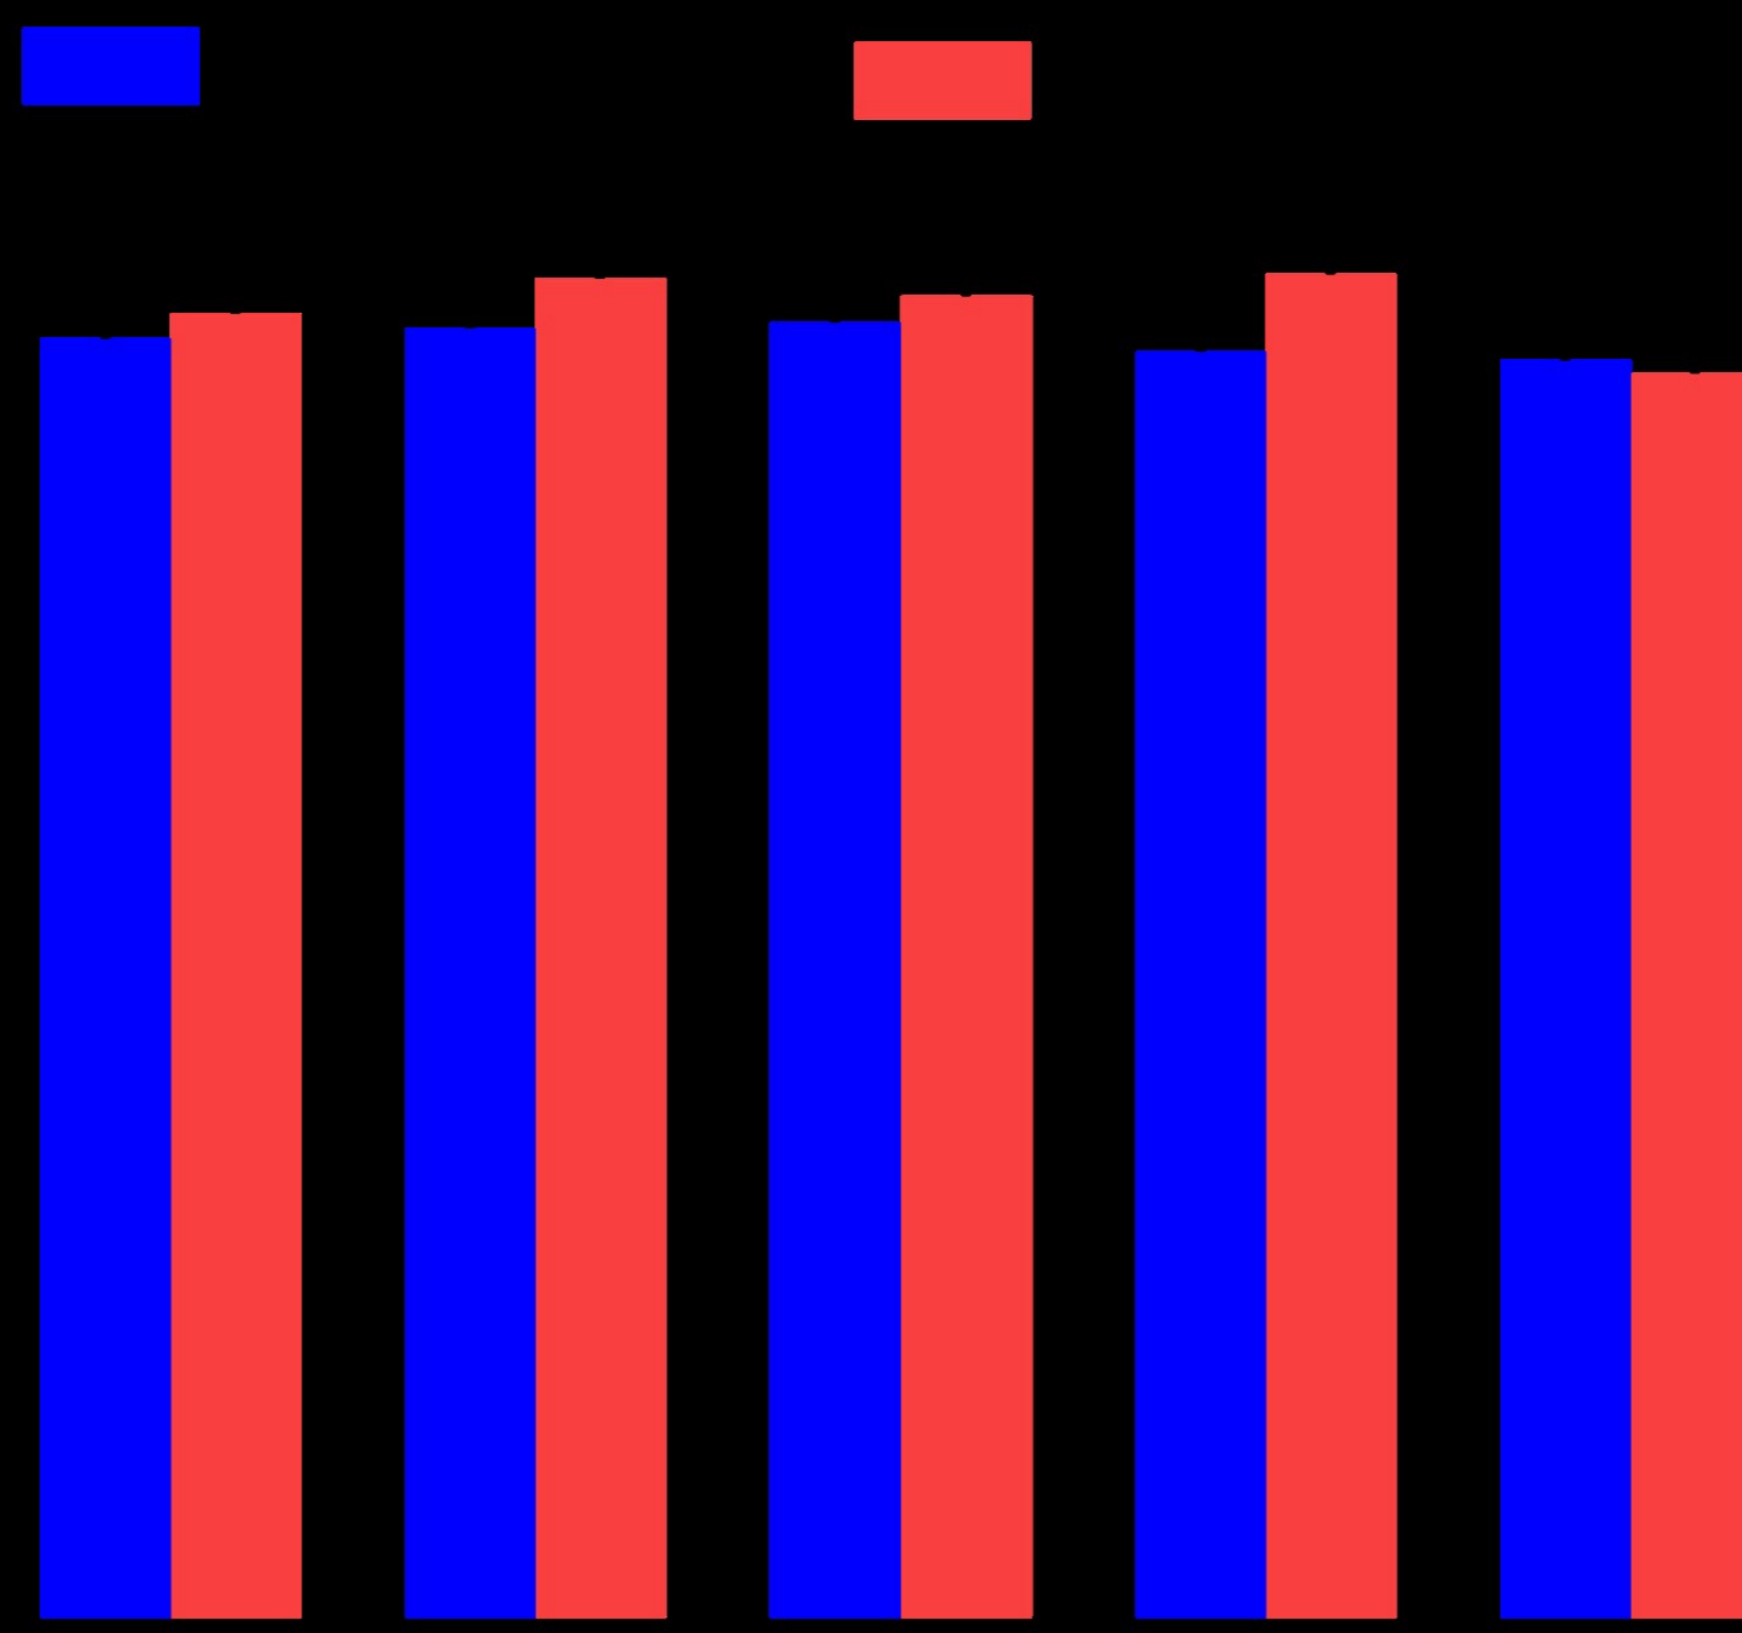

Supplement: d3nj00109a5.pdf [file d3nj00109a5.pdf]

SBA-15

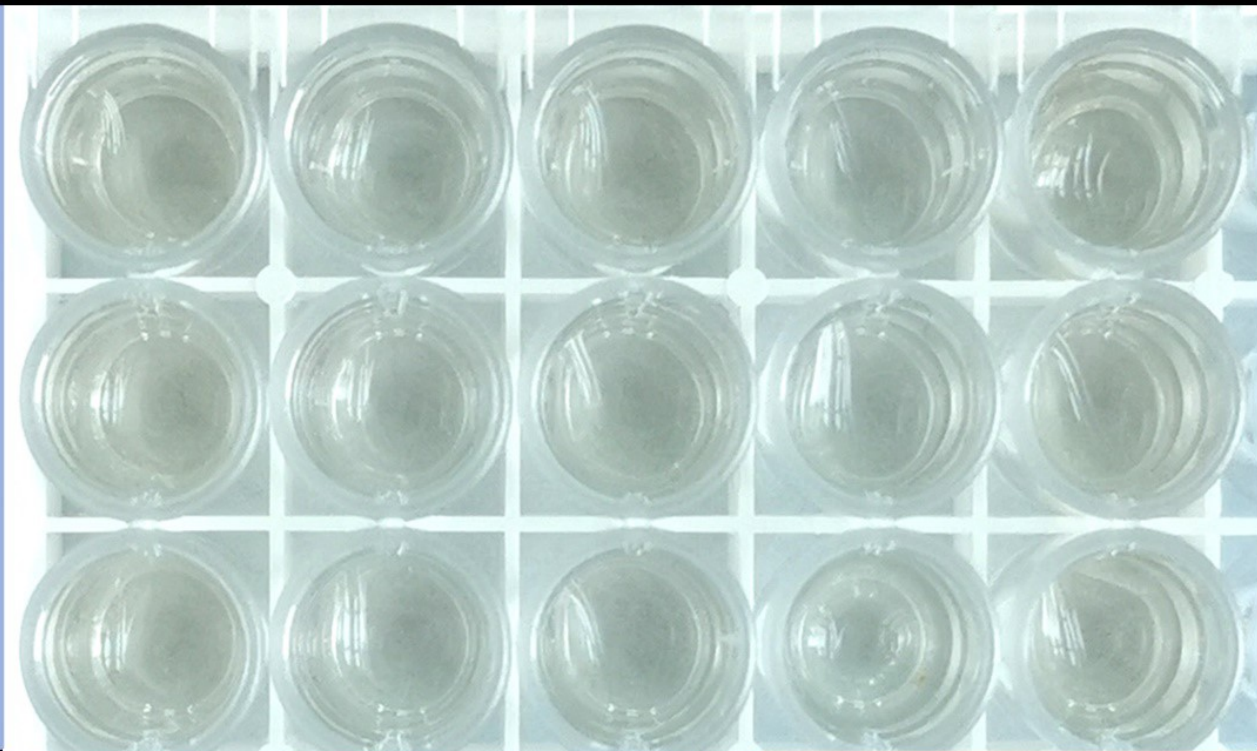

NH<sub>2</sub>-SBA-15

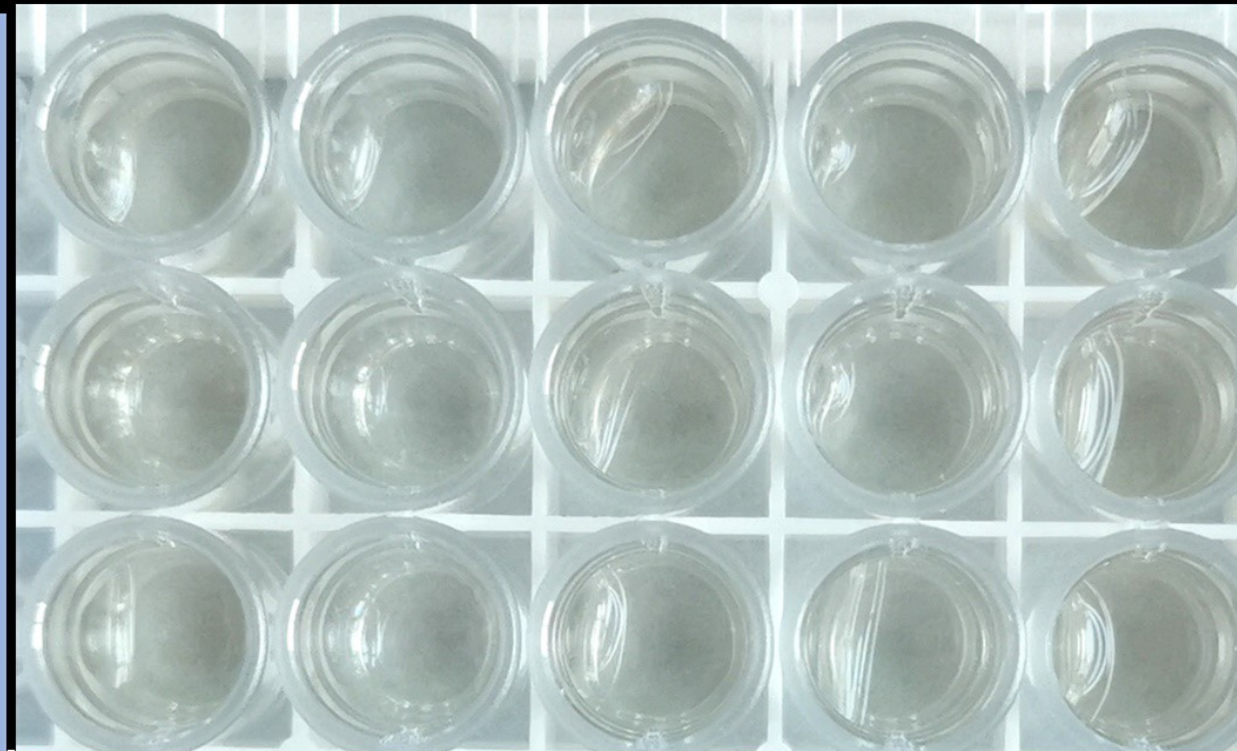

+

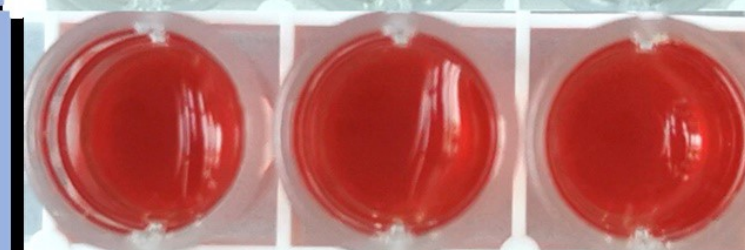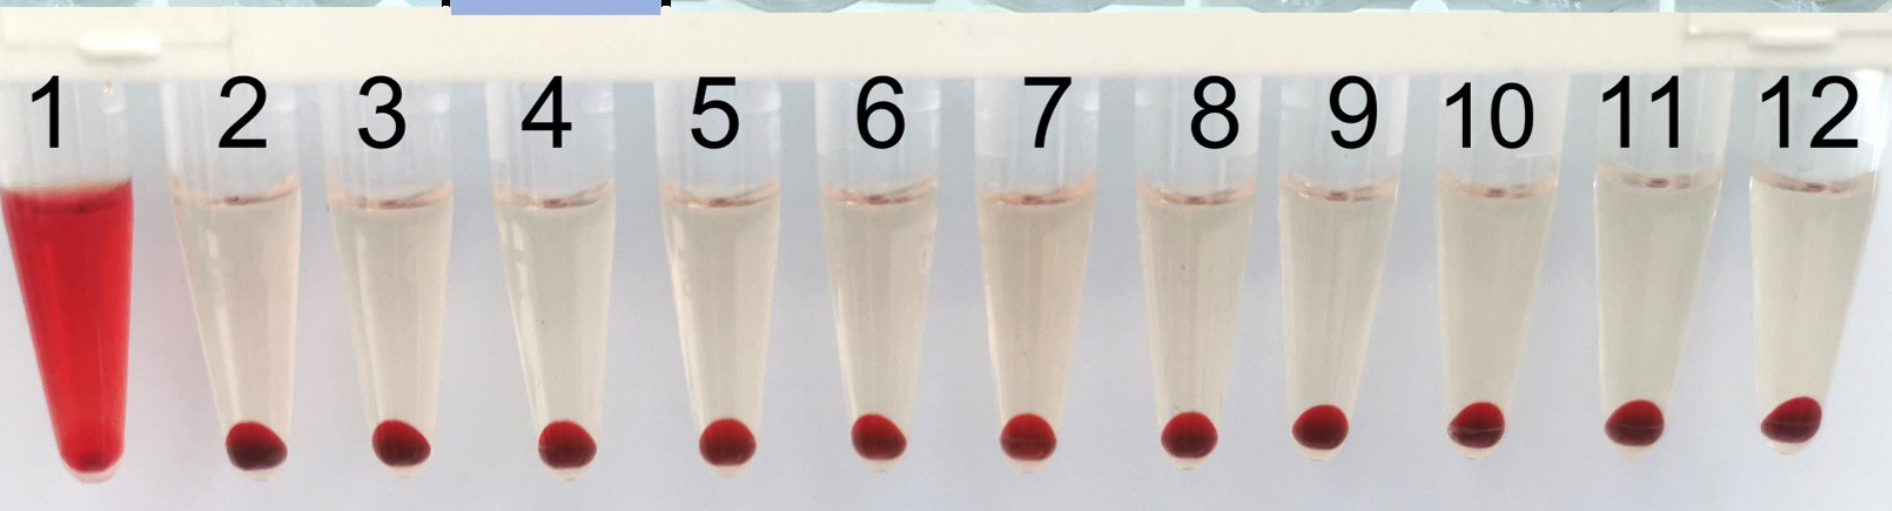

-

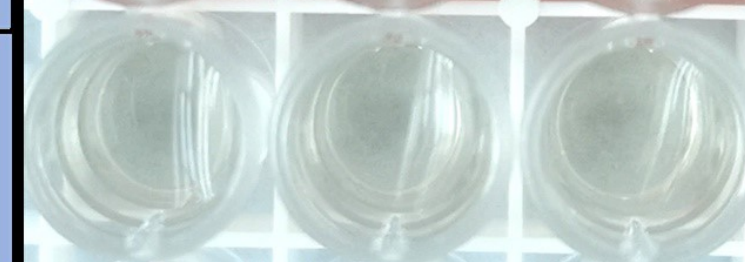

Supplement: d3nj00109a6.pdf [file d3nj00109a6.pdf]

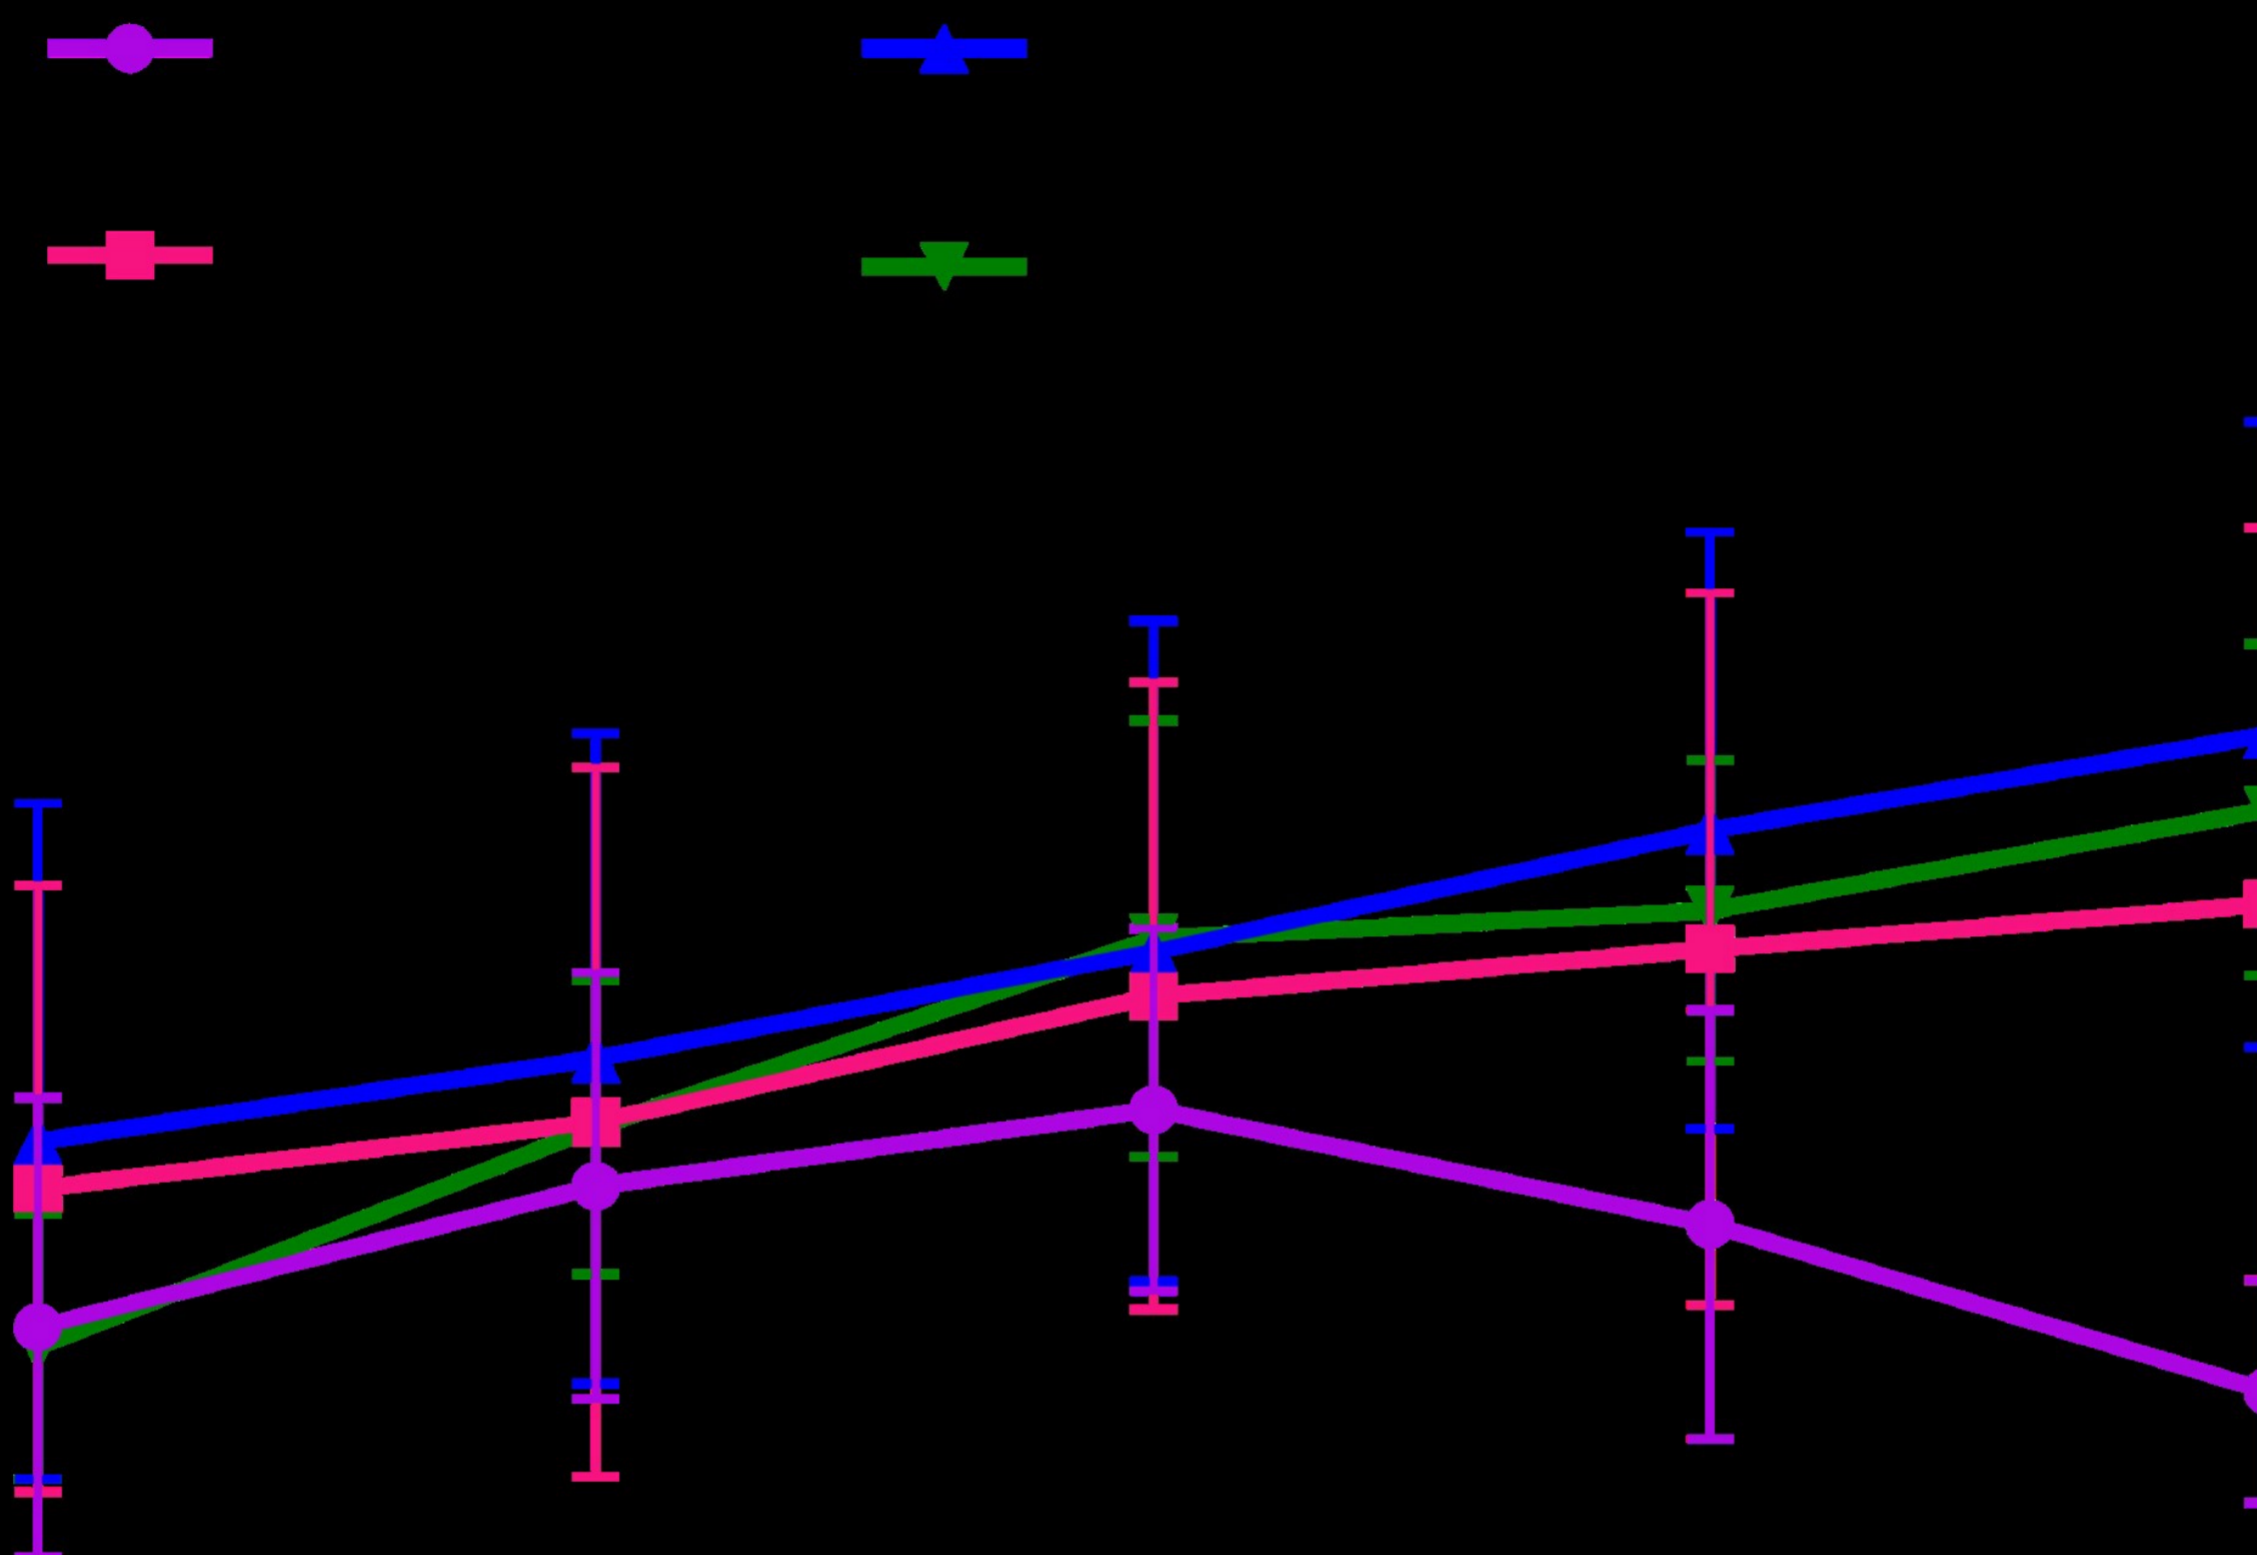

Supplement: d3nj00109a7.pdf [file d3nj00109a7.pdf]
